# Supplementary material for: D-CryptO: deep learning-based analysis of colon organoid morphology from brightfield images
Source: Royal Society of Chemistry journal article supplement (doi:10.1039/d2lc00596d), 2022-01-01
Supplement: d2lc00596d1.pdf [file d2lc00596d1.pdf]

## Supporting Information

### **D-CryptO: Deep learning-based analysis of colon organoid morphology from brightfield images**

Lyan Abdul<sup>1</sup>, Jocelyn Xu<sup>2</sup>, Alexander Sotra<sup>1</sup>, Abbas Chaudary<sup>3</sup>, Jerry Gao<sup>4</sup>, Shravanthi Rajasekar<sup>3</sup>, Nicky Anvari<sup>1</sup>, Hamidreza Mahyar<sup>5</sup>, and Boyang Zhang<sup>1,3\*</sup>

### **Dose-dependent changes in organoid morphology**

To further validate D-CryptO, we used it to assess the dose-dependent response of doxorubicin on opacity and budding following treatment at various concentrations. Doxorubicin is a chemotherapeutic that inhibits DNA and RNA synthesis and induces apoptosis.<sup>[1]</sup> We applied doxorubicin at concentrations of 50  $\mu\text{M}$ , 5  $\mu\text{M}$ , 0.5  $\mu\text{M}$ , 0.05  $\mu\text{M}$ , and 0.005  $\mu\text{M}$  (**Figure S1a**). For opacity, the concentration at which 50% of organoids became opaque was 3.6  $\mu\text{M}$  (**Figure S1b**). For budding, the concentration at which 50% of the organoids still had budding structures was 39.8  $\mu\text{M}$  (**Figure S1c**). It is important to note that budding did not increase with higher dosages of doxorubicin. Instead, the percentage of non-viable organoids increased which was classified under the budding category. For diameter, the concentration at which 50% of the organoids had a reduction in diameter was 0.5  $\mu\text{M}$  (**Figure S1d**). Each parameter was impacted at different concentrations, indicating the importance of monitoring these features to assess drug toxicity.

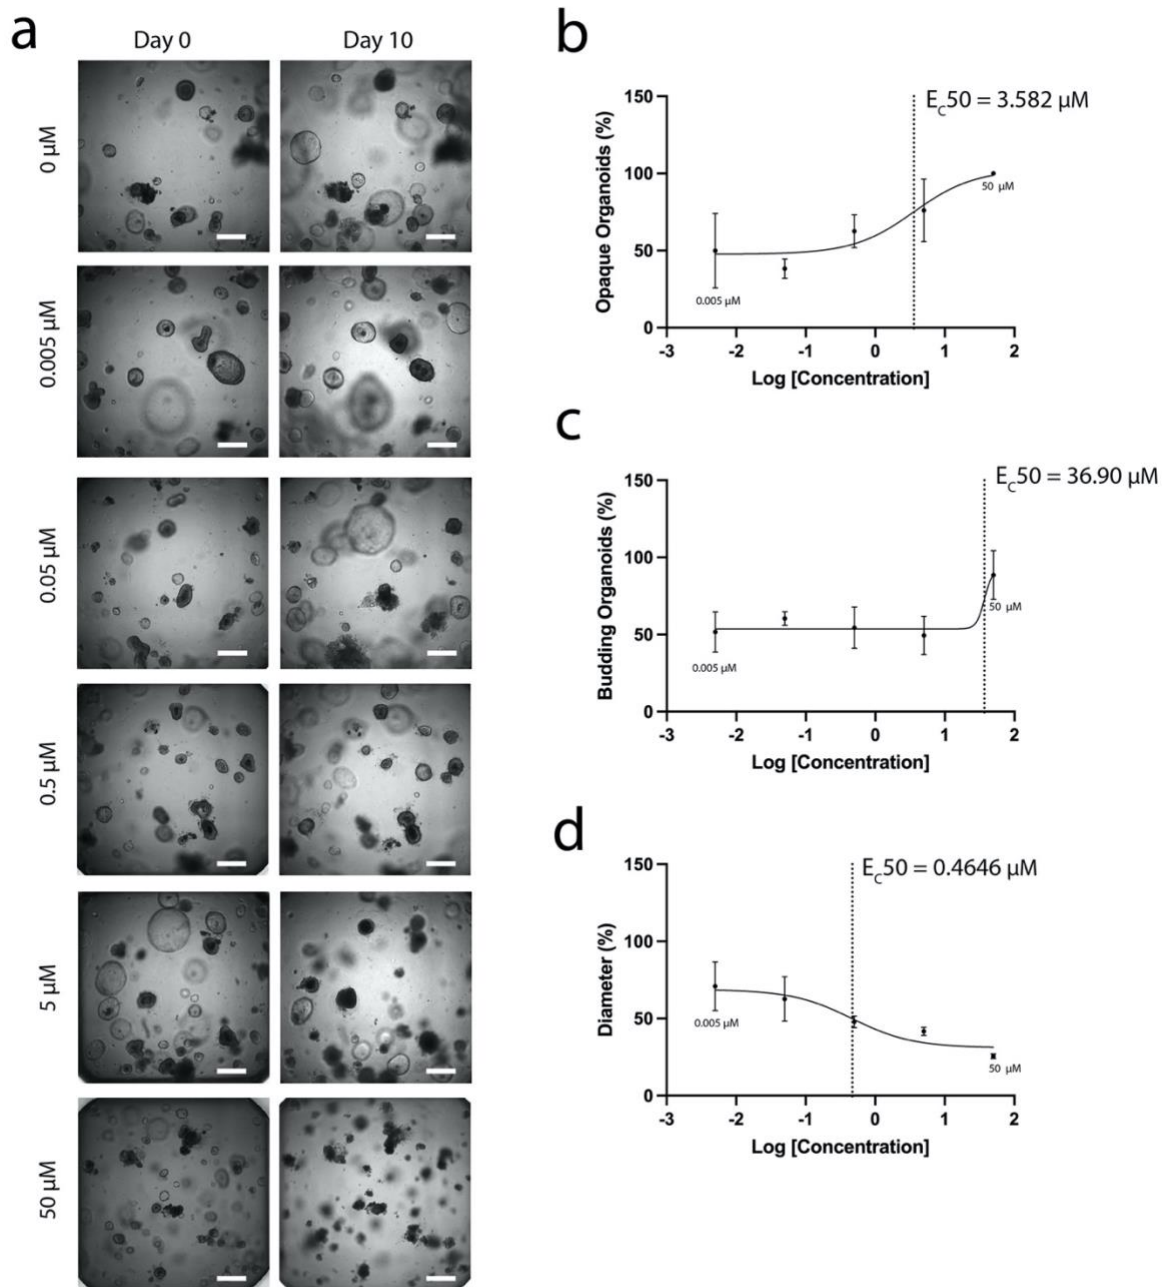

**Supplementary Figure 1. Dose-dependent changes in organoid morphology.** **a**, Brightfield images of organoids taken on Day 0 and Day 10 of drug treatment with doxorubicin at 5 different concentrations. Scale bar, 500  $\mu\text{m}$  **b**, The percentage of opaque organoids following 10 days of treatment with increasing concentrations of doxorubicin. **c**, The percentage of budding organoids following 10 days of treatment with increasing concentrations of doxorubicin. **d**, The change in diameter following 10 days of treatment with increasing concentrations of doxorubicin.

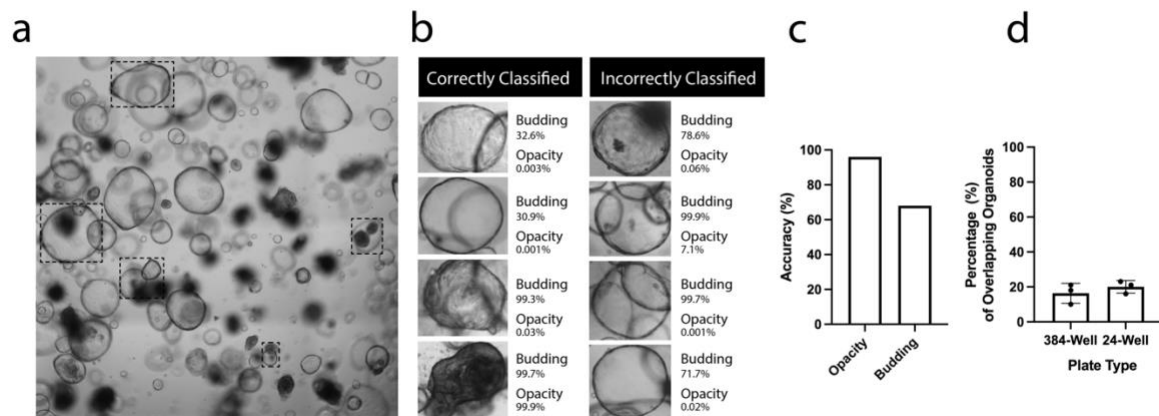

**Supplementary Figure 2. D-CryptO performance on overlapping organoids. a,** Examples of overlapping organoids. **b,** Correct and incorrect classifications by D-CryptO. **c,** D-CryptO accuracy when classifying overlapping organoids. **d,** Percentage of overlapping organoids in both 384 and 24-well plates.

## References

- [1] V. Malhotra, M. C. Perry, *Cancer Biol Ther* **2003**, 2, DOI 10.4161/CBT.199.
